# INFOGRAPHICS IN ANESTHESIOLOGY

Complex Information for Anesthesiologists Presented Quickly and Clearly

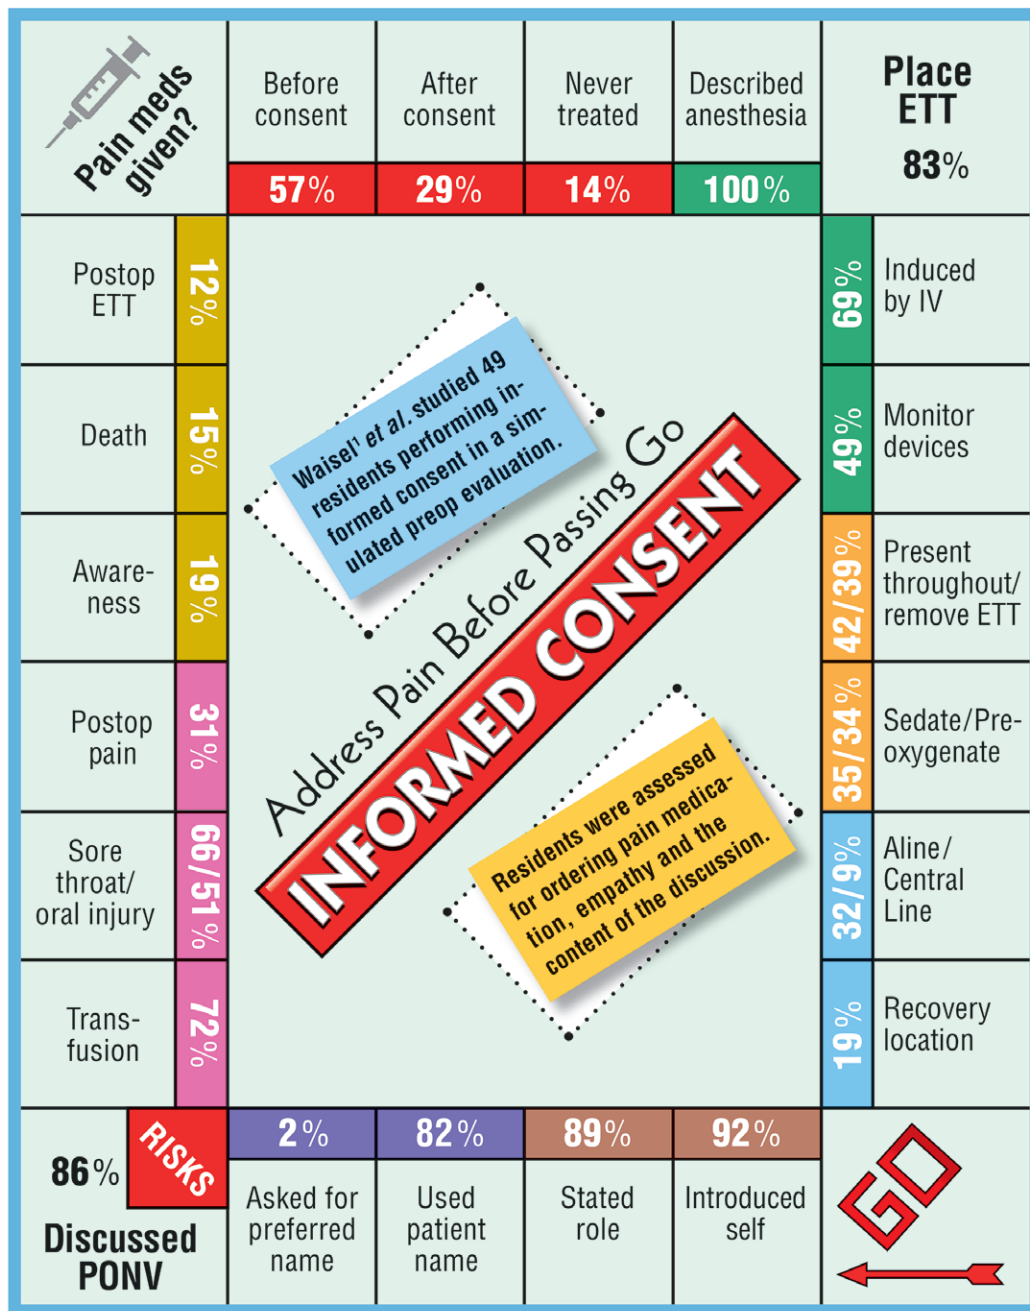

Anesthesia residents have variable responses to pain cues. Having practice opportunities with feedback may increase compassionate behavioral responses to patients in pain.

ETT, endotracheal tube; IV, intravenous; PONV, postoperative nausea and vomiting.

Infographic created by Jonathan P. Wanderer, Vanderbilt University Medical Center, and James P. Rathmell, Brigham and Women's Health Care/Harvard Medical School. Illustration by Annemarie Johnson, Vivo Visuals. Address correspondence to Dr. Wanderer: jonathan.p.wanderer@vanderbilt.edu.

1. Waisel DB, Ruben MA, Blanch-Hartigan D, Hall JA, Meyer EC, Blum RH: Compassionate and clinical behavior of residents in a simulated informed consent encounter. ANESTHESIOLOGY 2020; 132:159–69
